1           **Graduate students significantly more concerned than undergraduates about**  
2                           **returning to campus in the era of COVID-19**

3  
4                                           Mark H. Ebell MD, MS (1)

5  
6                                           Laura Bierema, EdD (2)

7  
8                                           Lauren Haines (1)

9  
10  
11           1. Department of Epidemiology and Biostatistics, College of Public Health, University of  
12                                           Georgia, Athens, GA, USA

13           2. Department of Lifelong Education Administration and Planning, College of Education,  
14                                           University of Georgia, Athens, GA, USA

15  
16  
17   **Corresponding author:**

18  
19   Mark H. Ebell MD, MS  
20   125 BS Miller Hall  
21   UGA Health Sciences Campus  
22   Athens, GA 30602  
23   [ebell@uga.edu](mailto:ebell@uga.edu)  
24   706-247-4953

25  
26   **Word counts**

27   Text: 1197 words

28   Abstract: 250 words

29   Tables: 1

30 **Abstract**

31 **Introduction**

32 As students return to colleges and universities in the fall of 2020, it is important to understand  
33 their perception of risk and their desire for in person versus online learning, which may differ  
34 between undergraduate and graduate students.

35 **Methods**

36 We anonymously surveyed 212 undergraduate and 134 graduate students in the College of  
37 Public Health, and 94 graduate students in the College of Education in late June, 2020. We  
38 asked them Likert style questions regarding their comfort returning to campus and their  
39 preferred learning strategies once back. We compared “Strongly agree/Agree” with  
40 “Neutral/Disagree/Strongly disagree” using a chi-square test.

41 **Results**

42 Graduate students were significantly less likely to look forward to being on campus (38.3%  
43 doctoral vs 40.6% master's vs 77.7% undergraduate,  $p < 0.001$ ), more likely to perceive  
44 themselves as high risk (43.3% doctoral vs 40.0% masters vs 17.5% undergraduate,  $p < 0.001$ ),  
45 and were more likely to prefer all classwork online (66.7% doctoral vs 44.6% master's vs 20.8%  
46 undergraduate,  $p < 0.001$ ). Graduate students were also less likely to prefer to be in the  
47 classroom as much as possible in the fall (59.2% doctoral vs 67.7% master's vs 74.5%  
48 undergraduate,  $p < 0.001$ ). Most were not concerned about their ability to conduct research.  
49 Students generally supported wearing of facemasks indoors.

50 **Conclusions**

51 There are important differences in perception of risk and desire for online versus in-person  
52 learning between undergraduate and graduate students. Faculty and administrators must  
53 acknowledge and address these differences as they prepare for return to campus in the fall.

54

## 55 **Introduction**

56 The COVID-19 pandemic caused by the SARS-CoV-2 virus has created a worldwide health  
57 crisis. There have been over 10 million confirmed cases and over 500,000 deaths worldwide,<sup>1</sup>  
58 with an estimated 10 undetected cases per confirmed case.<sup>2</sup> As students return to campus in  
59 the fall, it is important to understand their concerns and willingness to engage in usual  
60 classroom activities. We hypothesize that undergraduate and graduate students may have  
61 different attitudes towards returning to campus based on differences in age, attitudes toward  
62 risk-taking behavior, likelihood of comorbid illness, and different living circumstances.<sup>3,4</sup>  
63 Therefore, we anonymously surveyed students at the University of Georgia in the College of  
64 Public Health and the College of Education with regards to their attitudes toward returning to  
65 campus and their preferred learning environment.

66

## 67 **Methods**

68 The purpose of this survey was initially to provide guidance to faculty and administrators in the  
69 College of Public Health at the University of Georgia regarding re-opening in the fall in the face  
70 of the COVID-19 pandemic. The survey was shared with faculty in the College of Education who  
71 had similar concerns. Once the survey results were examined, it was clear that they might be of  
72 interest to the larger academic community and the decision was made to publish the results.  
73 The survey was performed online in late June, 2020.

74

75 The questions used a Likert style format, with options of “Strongly disagree”, “Strongly agree”,  
76 “Neutral”, “Agree”, and “Strongly agree”. After surveying students in the Department of  
77 Epidemiology and Biostatistics, the survey was slightly adapted by leadership of the College of  
78 Public Health (the question “I am comfortable with a requirement that students and faculty wear  
79 masks in indoor spaces and during classes” was changed to “Strongly encouraging student to  
80 wear face masks while indoors or during face-to-face lectures is a good idea”, and the question

81 “I prefer not to wear face masks while indoors or during face-to-face lectures” was added).  
82 Students in the other departments of the College of Public Health were then invited to  
83 participate, including graduate students and undergraduates. Finally, the survey was adapted  
84 by faculty in the program of Learning Leadership and Organizational Development in the  
85 College of Education and sent to their graduate students. They changed response categories  
86 from 5 to 4, eliminating “Neutral”.

87  
88 For analysis, categories were collapsed to “Strongly agree or agree” versus “Neutral, disagree,  
89 or strongly disagree”. The chi-square test was used to evaluate statistical significance. Because  
90 the surveys were originally done to guide policy and not as research, the Human Subjects  
91 committee designated this as not human subjects research.

92

### 93 **Results**

94 The survey was completed by 346 graduate and undergraduate students in the College of  
95 Public Health and 94 students in the College of Education. Among the College of Education  
96 students, all in the Department of Lifelong Education Administration and Planning, 79 were  
97 pursuing a doctoral degree and 15 a Master’s degree. Of the College of Public health students,  
98 70 were pursuing a doctoral degree, 64 a Master’s degree, and 212 were undergraduates in  
99 Health Promotion and Behavior or Environmental Health Sciences.

100

101

102 Graduate students were significantly more cautious regarding the return to campus. They were  
103 less likely to agree with the statement that they were looking forward to being on campus  
104 (38.3% doctoral vs 40.6% master's vs 77.7% undergraduate,  $p < 0.001$ ), and more likely to  
105 perceive themselves as being high risk for serious illness (43.3% doctoral vs 40.0% masters vs  
106 17.5% undergraduate,  $p < 0.001$ ). They were also more likely to agree that they preferred to

107 have all lectures and classwork online in the fall (66.7% doctoral vs 44.6% master's vs 20.8%  
108 undergraduate,  $p < 0.001$ ), and less likely to prefer to be in the classroom as much as possible  
109 in the fall (59.2% doctoral vs 67.7% master's vs 74.5% undergraduate,  $p < 0.001$ ). Just over  
110 one-third of public health students were concerned about their ability to conduct research and  
111 this did not differ by student category. Students generally supported wearing of facemasks while  
112 indoors.

113  
114 Conversely, undergraduate students had the lowest percentages for agreeing they were  
115 concerned about acquiring COVID-19 upon return, for agreeing they wanted all classwork online  
116 this fall, and for agreeing they were apprehensive about coming back to campus. Responses of  
117 graduate students in the College of Education were compared with graduate students in the  
118 College of Public Health. Students in the College of Public Health were slightly less likely to  
119 favor a requirement to wear masks (74% vs 88%,  $p = 0.03$ ). Otherwise there were no significant  
120 differences in responses to the other questions.

121  
122 **Discussion**

123 As students, faculty, staff, and administrators contemplate the return to campus this fall in the  
124 face of COVID-19, each group is assessing their comfort with in-person teaching and on  
125 campus meetings. In our survey, we found that students should not be treated as a monolithic  
126 group, and that graduate students were much more concerned about their risk of acquiring  
127 infection and significantly more comfortable with the idea of online instruction than  
128 undergraduates.

129  
130 The disparity between undergraduate and graduate perspectives about on campus instruction  
131 and activities suggests that typical "Return to Campus Guidelines" do not cater to graduate  
132 student concerns. This survey is critical to understanding that diverse student groups have

133 differing perspectives of risk. Given these range of perspectives regarding health and safety,  
134 universities should provide more latitude in how courses and meetings will be conducted in light  
135 of concerns for safety.

136

137 In 2018 there were approximately 1.8 million graduate students in the United States, of whom  
138 57% were enrolled full-time with the largest enrollments in education, business, and health  
139 sciences.<sup>5</sup> These fields also have the largest proportions of part-time graduate students who  
140 likely manage employment and dependent care in addition to graduate school. Notably, 57% of  
141 graduate students are women,<sup>6</sup> who usually bear the burden of domestic tasks and dependent  
142 care. Further, research on homeschooling during the pandemic shows it is being handled  
143 disproportionately by women,<sup>7</sup> and longitudinal data show working mothers shoulder the bulk of  
144 childcare and housework without reductions in work hours of more than 2 hours per day as  
145 compared to 40 minutes for men.<sup>8</sup>

146

147 The average age of graduate students in the United States is approximately 33 years old,<sup>4</sup> a  
148 figure that has remained static over the years, with 22% of all graduate students over the age of  
149 40 years.<sup>9</sup> Only 48% of graduate students are unmarried with no dependents,<sup>4</sup> suggesting that  
150 over half of graduate students tend to have more adult-like responsibilities than undergraduates  
151 such as employment and dependent care, potentially putting graduate students at higher risk of  
152 exposing family members and work colleagues to COVID-19 if they are attending courses on  
153 campus.

154

## 155 **Conclusions**

156 It is important for university programs to take an evidence-based and flexible approach to the  
157 return to campus, one that addresses the differing concerns of graduate and undergraduate  
158 students. This is especially important in health and leadership professions where students are

159 learning how critical decisions affect the health and wellbeing of organizations and communities.  
160 Administrators are advocating a “HyFlex” approach to instruction. We advocate that university  
161 administrators should adopt a similarly flexible approach that emboldens faculty and students to  
162 make decisions about pedagogy that reflect their personal risk factors, concerns, and goals.

163

#### 164 **Funding**

165 This study was not externally funded.

166

#### 167 **Acknowledgements**

168 The authors thank the students in the University of Georgia’s Colleges of Public Health and  
169 Education for their time spent completing this survey.

170

171

172 **References**

- 173 1. Johns Hopkins COVID-19 Dashboard. <https://coronavirus.jhu.edu/map.html>. Accessed  
174 June 27, 2020.
- 175 2. Stringhini S, Wisniak A, Piumatti G, et al. Seroprevalence of anti-SARS-CoV-2 IgG  
176 antibodies in Geneva, Switzerland (SEROCoV-POP): a population-based study. *Lancet*.  
177 2020. doi:10.1016/s0140-6736(20)31304-0
- 178 3. Romer D. Adolescent risk taking, impulsivity, and brain development: Implications for  
179 prevention. *Dev Psychobiol*. 2010. doi:10.1002/dev.20442
- 180 4. NCES. National Postsecondary Student Aid Study National Postsecondary Student Aid  
181 Study (NPSAS). In: *NCES HANDBOOK OF SURVEY METHODS*. ; 2017.
- 182 5. Okahana H, Zhou E. Graduate Enrollment and Degrees: 2007-2017. *Washington, DC*  
183 *Counc Grad Sch*. 2018.
- 184 6. Choy SP, Cataldi EF, National Center for Education Statistics (ED) DC. W, MPR  
185 Associates CA. B. *Student Financing of Graduate and First-Professional Education:*  
186 *2003-04. Profiles of Students in Selected Degree Programs and Part-Time Students.*  
187 *Statistical Analysis Report. NCES 2006-185.*; 2006.
- 188 7. Miller CC. Nearly Half of Men Say They Do Most of the Home Schooling. 3 Percent of  
189 Women Agree. *The New York Times*.  
190 [https://www.nytimes.com/2020/05/06/upshot/pandemic-chores-homeschooling-](https://www.nytimes.com/2020/05/06/upshot/pandemic-chores-homeschooling-gender.html)  
191 [gender.html](https://www.nytimes.com/2020/05/06/upshot/pandemic-chores-homeschooling-gender.html).
- 192 8. Yavorsky JE, Kamp Dush CM, Schoppe-Sullivan SJ. The Production of Inequality: The  
193 Gender Division of Labor Across the Transition to Parenthood. *J Marriage Fam*. 2015.  
194 doi:10.1111/jomf.12189
- 195 9. Bell NE. Council of Graduate Schools (2009). Research report: Data Sources: Non-  
196 Traditional Students in Graduate Education.  
197 [https://cgsnet.org/ckfinder/userfiles/files/DataSources\\_2009\\_12.pdf](https://cgsnet.org/ckfinder/userfiles/files/DataSources_2009_12.pdf). Accessed July 14,



198            2020.

199

200

201 Table 1. were less likely to want to be on campus  
202

| Question                                                                                                                   | Undergrad | Master's | Doctoral | p      |
|----------------------------------------------------------------------------------------------------------------------------|-----------|----------|----------|--------|
| I am looking forward to being on campus in the fall                                                                        | n=211     | n=64     | n=141    |        |
| Strongly agree or agree                                                                                                    | 77.7%     | 40.6%    | 38.3%    | p<.001 |
| Neutral, disagree, or strongly disagree                                                                                    | 22.3%     | 59.4%    | 61.7%    |        |
| I am concerned about acquiring the COVID-19 infection after returning to campus                                            | n=212     | n=65     | n=141    |        |
| Strongly agree or agree                                                                                                    | 71.2%     | 78.5%    | 83.7%    | p=.024 |
| Neutral, disagree, or strongly disagree                                                                                    | 28.8%     | 21.5%    | 16.3%    |        |
| I feel that I may be at higher than average risk of serious illness associated with COVID-19                               | n=212     | n=65     | n=141    |        |
| Strongly agree or agree                                                                                                    | 17.5%     | 40.0%    | 43.3%    | p<.001 |
| Neutral, disagree, or strongly disagree                                                                                    | 82.5%     | 60.0%    | 56.7%    |        |
| I prefer not to wear face masks while indoors or during face-to-face lectures                                              | n=212     | n=49     | n=39     |        |
| Strongly agree or agree                                                                                                    | 16.5%     | 6.1%     | 7.7%     | p=.082 |
| Neutral, disagree, or strongly disagree                                                                                    | 83.5%     | 93.9%    | 92.3%    |        |
| I am apprehensive about being on campus in the fall                                                                        | n=212     | n=65     | n=140    |        |
| Strongly agree or agree                                                                                                    | 48.6%     | 64.6%    | 69.3%    | p<.001 |
| Neutral, disagree, or strongly disagree                                                                                    | 51.4%     | 35.4%    | 30.7%    |        |
| I am not particularly worried about acquiring the COVID-19 infection after returning to campus                             | n=212     | n=65     | n=140    |        |
| Strongly agree or agree                                                                                                    | 21.2%     | 21.5%    | 19.3%    | p=.89  |
| Neutral, disagree, or strongly disagree                                                                                    | 78.8%     | 78.5%    | 80.7%    |        |
| I am comfortable with a requirement that students and faculty wear masks in indoor spaces and during classes. (EpiBios and |           | n=30     | n=109    |        |

|                                                                                                          |       |       |       |        |
|----------------------------------------------------------------------------------------------------------|-------|-------|-------|--------|
| COE only)                                                                                                |       |       |       |        |
| Strongly agree or agree                                                                                  |       | 70.0% | 87.2% | p=.025 |
| Neutral, disagree, or strongly disagree                                                                  |       | 30.0% | 12.8% |        |
| Strongly encouraging students to wear masks while indoors or during face-to-face lectures is a good idea | n=212 | n=35  | n=32  |        |
| Strongly agree or agree                                                                                  | 85.8% | 91.4% | 96.9% | p=.161 |
| Neutral, disagree, or strongly disagree                                                                  | 14.2% | 8.6%  | 3.1%  |        |
| I would prefer to have all lectures and classwork online this fall                                       | n=212 | n=35  | n=32  |        |
| Strongly agree or agree                                                                                  | 20.8% | 44.6% | 66.7% | p<.001 |
| Neutral, disagree, or strongly disagree                                                                  | 79.2% | 55.4% | 33.3% |        |
| I prefer to be in the classroom as much as possible this fall                                            | n=211 | n=65  | n=141 |        |
| Strongly agree or agree                                                                                  | 74.5% | 67.7% | 59.2% | p<.001 |
| Neutral, disagree, or strongly disagree                                                                  | 25.5% | 32.3% | 40.8% |        |
| I am concerned about my ability to conduct research in the fall                                          | n=212 | n=49  | n=38  |        |
| Strongly agree or agree                                                                                  | 35.9% | 36.7% | 36.8% | p=.988 |
| Neutral, disagree, or strongly disagree                                                                  | 64.1% | 63.3% | 63.2% |        |
| I am concerned about maintaining good progress towards my degree                                         | n=212 | n=49  | n=39  |        |
| Strongly agree or agree                                                                                  | 52.4% | 63.3% | 43.6% | p=.174 |
| Neutral, disagree, or strongly disagree                                                                  | 47.6% | 36.7% | 56.4% |        |

203 Undergrad = BA or BS; Master's = MS or MPH or MEd; Doctoral = PhD, EdD, or DrPH  
 204
